# Supplementary material for: Shaking Youngsters and Shaken Adults: Female Beetles Eavesdrop on Larval Seed Vibrations to Make Egg-Laying Decisions
Source: PubMed Central journal article supplement (PMC4768006; doi:10.1371/journal.pone.0150034), 2016-02-25
Supplement: pone.0150034.s002.pdf [file pone.0150034.s002.pdf]

| Female body mass (mg) | Latency for egg-laying (min) | Latency for egg-laying (min) |
|-----------------------|------------------------------|------------------------------|
| 5.5                   | 1.58                         |                              |
| 4.7                   | 0.55                         | Campinas South India         |
| 5.5                   | 5.22                         | 1.58 1.43                    |
| 5.4                   | 3.25                         | 0.55 4.48                    |
| 4.8                   | 3.35                         | 5.22 6.36                    |
| 4.6                   | 0.33                         | 3.25 6.22                    |
| 4.8                   | 4.37                         | 3.35 6.25                    |
| 3.7                   | 1.85                         | 0.33 6.88                    |
| 5                     | 2.38                         | 4.37 2.38                    |
| 3.5                   | 1.65                         | 1.85 3                       |
| 4.6                   | 1.77                         | 2.38 13.85                   |
| 3.7                   | 2.95                         | 1.65 1.28                    |
| 4.7                   | 4.43                         | 1.77 9.72                    |
| 4.3                   | 4.77                         | 2.95 3.85                    |
| 5.7                   | 1.58                         | 4.43 0.28                    |
| 5.2                   | 1.02                         | 4.77 3.07                    |
| 6.2                   | 0.97                         | 1.58 5.53                    |
| 5.4                   | 2.03                         | 1.02 1.18                    |
| 4.6                   | 4.03                         | 0.97 18                      |
| 6.7                   | 0.78                         | 2.03 0.98                    |
| 3.6                   | 2.7                          | 4.03 0.33                    |
| 6.1                   | 0.58                         | 0.78 7.43                    |
| 5.6                   | 5.2                          | 2.7 1.88                     |
| 4.1                   | 8.27                         | 0.58 5.95                    |
| 6.4                   | 2.28                         | 5.2 9.22                     |
| 4.2                   | 2.62                         | 8.27 7.75                    |
| 3.6                   | 2.92                         | 2.28 10.9                    |
| 5.3                   | 1.8                          | 2.62 4.47                    |
| 5.1                   | 1.37                         | 2.92 1.93                    |
| 4.8                   | 1.67                         | 1.8 2.45                     |
| 3.3                   | 4.25                         | 1.37 2.3                     |
| 4.2                   | 0.88                         | 1.67 11.7                    |
| 3.2                   | 0.63                         | 4.25 1.88                    |
| 4.3                   | 2.9                          | 0.88 0.93                    |
| 3.9                   | 2.08                         | 0.63 14.4                    |
| 3.8                   | 2.47                         | 2.9 5.65                     |
| 5.4                   | 0.93                         | 2.08 9.72                    |
| 5.3                   | 10.28                        | 2.47 6.75                    |
| 5.2                   | 2.98                         | 0.93 0.77                    |
| 5.9                   | 2.27                         | 10.28 13.8                   |
| 5.8                   | 4.35                         | 2.98 3.32                    |
| 3.3                   | 1.8                          | 2.27 2.73                    |
| 4.2                   | 7.67                         | 4.35 7.42                    |
| 4.9                   | 4.32                         | 1.8 1.91                     |
| 3.6                   | 0.23                         | 7.67 1.13                    |
| 5.2                   | 5.1                          | 4.32 4.85                    |
| 4.9                   | 2.6                          | 0.23 0.23                    |
| 5                     | 9.62                         | 5.1 3.33                     |
| 4.6                   | 2.67                         | 2.6 7.35                     |
| 3.8                   | 2.75                         | 9.62 4.75                    |
| 4.5                   | 2.37                         | 2.67 0.63                    |
| 6.2                   | 2.18                         | 2.75 1.13                    |
| 6.5                   | 5.37                         | 2.37 12.48                   |
| 5.5                   | 10.2                         | 2.18 15.68                   |
| 5                     | 6.27                         | 5.37 1.73                    |
| 4.4                   | 3.35                         | 10.2 1.78                    |

|     |       |       |       |
|-----|-------|-------|-------|
| 4.3 | 3.2   | 6.27  | 1.5   |
| 4.4 | 5.73  | 3.35  | 12.17 |
| 5.9 | 5.27  | 3.2   | 2.35  |
| 3.8 | 0.9   | 5.73  | 4.97  |
| 6.2 | 3.13  | 5.27  | 2.83  |
| 4.3 | 4.75  | 0.9   | 9.02  |
| 5.2 | 2.62  | 3.13  | 2.33  |
| 4.6 | 3.3   | 4.75  | .     |
| 6   | 1.92  | 2.62  | .     |
| 6.1 | 0.55  | 3.3   | .     |
| 6.9 | 5.55  | 1.92  | 2.28  |
| 3.6 | 2.22  | 0.55  | 0.93  |
| 4.6 | 12.18 | 5.55  | 12.03 |
| 5.4 | 3.88  | 2.22  | 3.75  |
| 5.2 | 3.23  | 12.18 | 1.03  |
| 4.6 | 2.65  | 3.88  | 5.75  |
| 4.3 | 2.9   | 3.23  | .     |
| 3.5 | 1.47  | 2.65  | .     |
| 4   | 1.42  | 2.9   | .     |
| 7.2 | 16.75 | 1.47  | .     |
| 6.2 | 13.22 | 1.42  | .     |
| 5.3 | 10.93 |       |       |
| 7.1 | 5.95  |       |       |
| 6.6 | 6.73  |       |       |
| 6.1 | 17.73 |       |       |
| 5.5 | 3.83  |       |       |
| 5.6 | 9.93  |       |       |
| 4.8 | 7.42  |       |       |
| 5.9 | 15.5  |       |       |
| 6   | 3.5   |       |       |
| 6   | 3.55  |       |       |
| 6.3 | 17.72 |       |       |
| 7.5 | 18.37 |       |       |
| 5.8 | 21.63 |       |       |
| 5.2 | 3.4   |       |       |
| 5   | 5.95  |       |       |
| 6.1 | 8.83  |       |       |
| 5.2 | 10.07 |       |       |
| 6   | 16.8  |       |       |
| 5.3 | 6.4   |       |       |
| 6.1 | 9.37  |       |       |
| 6.4 | 5.85  |       |       |
| 7.5 | 5.25  |       |       |
| 6.1 | 3.5   |       |       |
| 6.9 | 1.43  |       |       |
| 6.9 | 4.48  |       |       |
| 8.5 | 6.36  |       |       |
| 9   | 6.22  |       |       |
| 7.5 | 6.25  |       |       |
| 8.2 | 6.88  |       |       |
| 8.8 | 2.38  |       |       |
| 7.1 | 3     |       |       |
| 8   | 13.85 |       |       |
| 6.8 | 1.28  |       |       |
| 8.8 | 9.72  |       |       |
| 8.3 | 3.85  |       |       |
| 8.1 | 0.28  |       |       |
| 6.2 | 3.07  |       |       |

|       |       |
|-------|-------|
| 7.6   | 5.53  |
| 8.8   | 1.18  |
| 8.4   | 18    |
| 7.5   | 0.98  |
| 8.1   | 0.33  |
| 8.3   | 7.43  |
| 7.4   | 1.88  |
| 7.8   | 5.95  |
| 6.6   | 9.22  |
| 8.2   | 7.75  |
| 7.9   | 10.9  |
| 8.4   | 4.47  |
| 3.9   | 1.93  |
| 7     | 2.45  |
| 8.2   | 2.3   |
| 7.8   | 11.7  |
| 8.6   | 1.88  |
| 6.2   | 0.93  |
| 9     | 14.4  |
| 9.7   | 5.65  |
| 9.6   | 9.72  |
| 6.3   | 6.75  |
| 9.5   | 0.77  |
| 6.4   | 13.8  |
| 7.3   | 3.32  |
| 7.4   | 2.73  |
| 7.9   | 7.42  |
| 5.7   | 1.91  |
| 8.4   | 1.13  |
| 9.5   | 4.85  |
| 8.5   | 0.23  |
| 8.6   | 3.33  |
| 7.1   | 7.35  |
| 8.3   | 4.75  |
| 8.4   | 0.63  |
| 7.2   | 1.13  |
| 9.6   | 12.48 |
| 9.4   | 15.68 |
| 7.7   | 1.73  |
| 8     | 1.78  |
| 8.7   | 1.5   |
| 5.6   | 12.17 |
| 8.2   | 2.35  |
| 8     | 4.97  |
| 7.5   | 2.83  |
| 7.8   | 9.02  |
| 8.2   | 2.33  |
| 8.5 . |       |
| 6.4 . |       |
| 8.2 . |       |
| 8.1   | 2.28  |
| 7.8   | 0.93  |
| 8     | 12.03 |
| 8     | 3.75  |
| 7.7   | 1.03  |
| 8.3   | 5.75  |
| 7.4 . |       |
| 8.7 . |       |

|       |       |
|-------|-------|
| 8 .   |       |
| 7.7 . |       |
| 9.1 . |       |
| 9.5   | 5.8   |
| 7.3   | 13.92 |
| 6.8   | 2.05  |
| 7.6   | 8.52  |
| 7     | 2.05  |
| 8.5   | 6.72  |
| 6.4   | 17.93 |
| 6.8   | 14.03 |
| 7.7   | 16.75 |
| 7.5   | 7.22  |
| 8.5   | 18.48 |
| 8     | 6.9   |
| 6.4   | 1.35  |
| 8     | 2.02  |
| 7.9   | 9.25  |
| 9     | 9.15  |
| 7.8   | 13.57 |
| 8     | 0.4   |
| 8.5   | 8.38  |
| 7.1   | 5.98  |
| 7.1   | 14.17 |
| 9.2   | 11.98 |
| 8.1   | 5.95  |
| 8.7   | 6.75  |
| 7.9   | 14.82 |
